# Supplementary material
Source: publisher figshare collection journal article supplement (https://acs.figshare.com/ndownloader/files/12000296)
Supplement: Supplementary file 1 [file 12000296]

# Detection of Inorganic Salt Based Home Made Explosives (HME) by Atmospheric Flow Tube – Mass Spectrometry

Robert G. Ewing\*, Blandina R. Valenzuela, David A. Atkinson and Eric D. Wilcox Freeburg  
Pacific Northwest National Laboratory, 902 Battelle Blvd., Richland, WA 99352, United States

## Supporting Information

**S2-** Mass spectra of  $\text{NaClO}_4$  and  $\text{Sr}(\text{ClO}_4)_2$

**S3-** Signal fluctuations of the nitrate reactant ion and the hydrogen peroxide-nitrate adduct.

**S4-** Signal fluctuations of the nitrate reactant ion and the nitrate-nitric acid adduct.

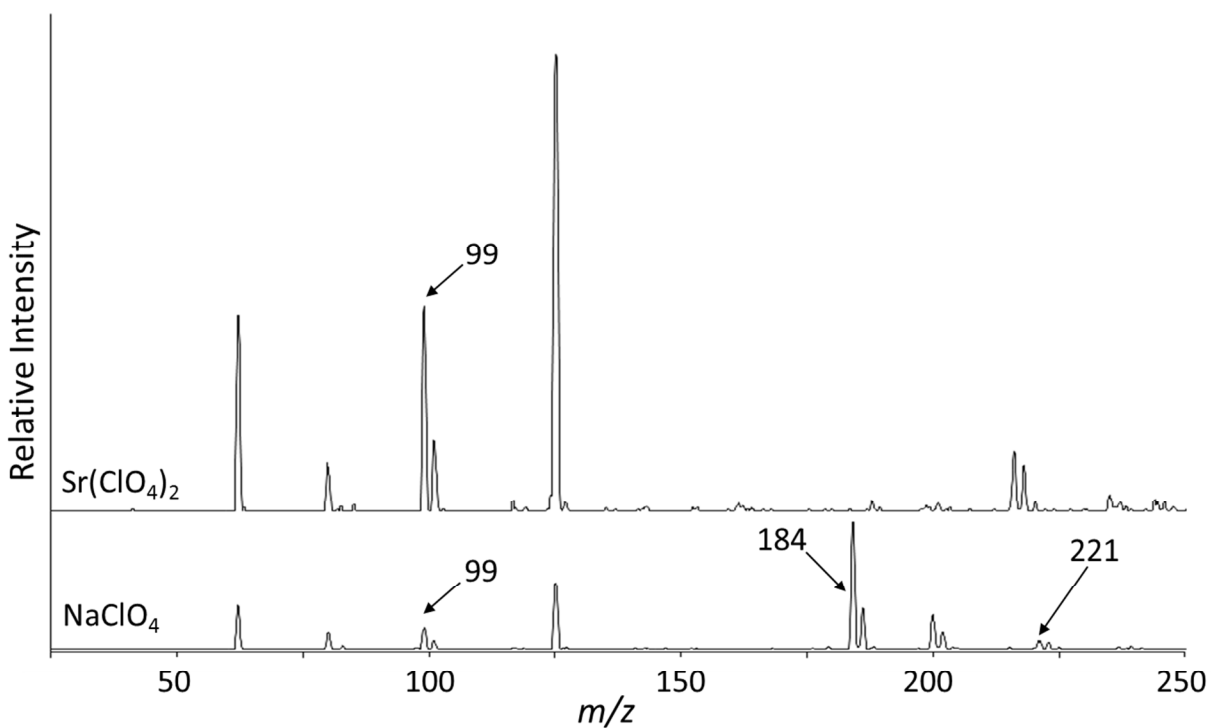

**Figure S2** represents the mass spectra from the thermal desorption of 2 perchlorate compounds,  $\text{NaClO}_4$  and  $\text{Sr}(\text{ClO}_4)_2$ . Both demonstrate the formation of the perchlorate ion at  $m/z$  99. The  $\text{NaClO}_4$  also forms adducts with the nitrate and perchlorate ions at  $m/z$  of 184 and 221 respectively.

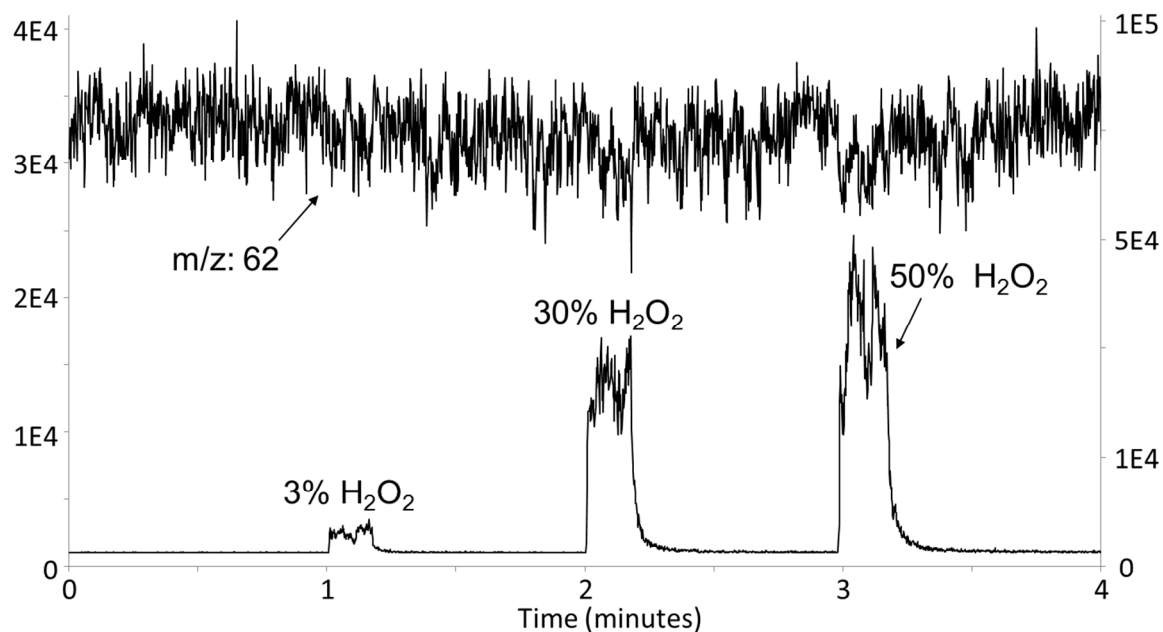

**Figure S3** is a plot of the nitrate reactant ions with the y-axis on the right (higher intensity) and the hydrogen peroxide – nitrate ion cluster with the y-axis on the left (lower intensity). A vial containing 3, 30, and 50% hydrogen peroxide was brought to the inlet of the AFT at 1, 2, and 3 min. respectively and remained there for 15 seconds. The graph demonstrates how the signal fluctuations scale with the signal intensity.

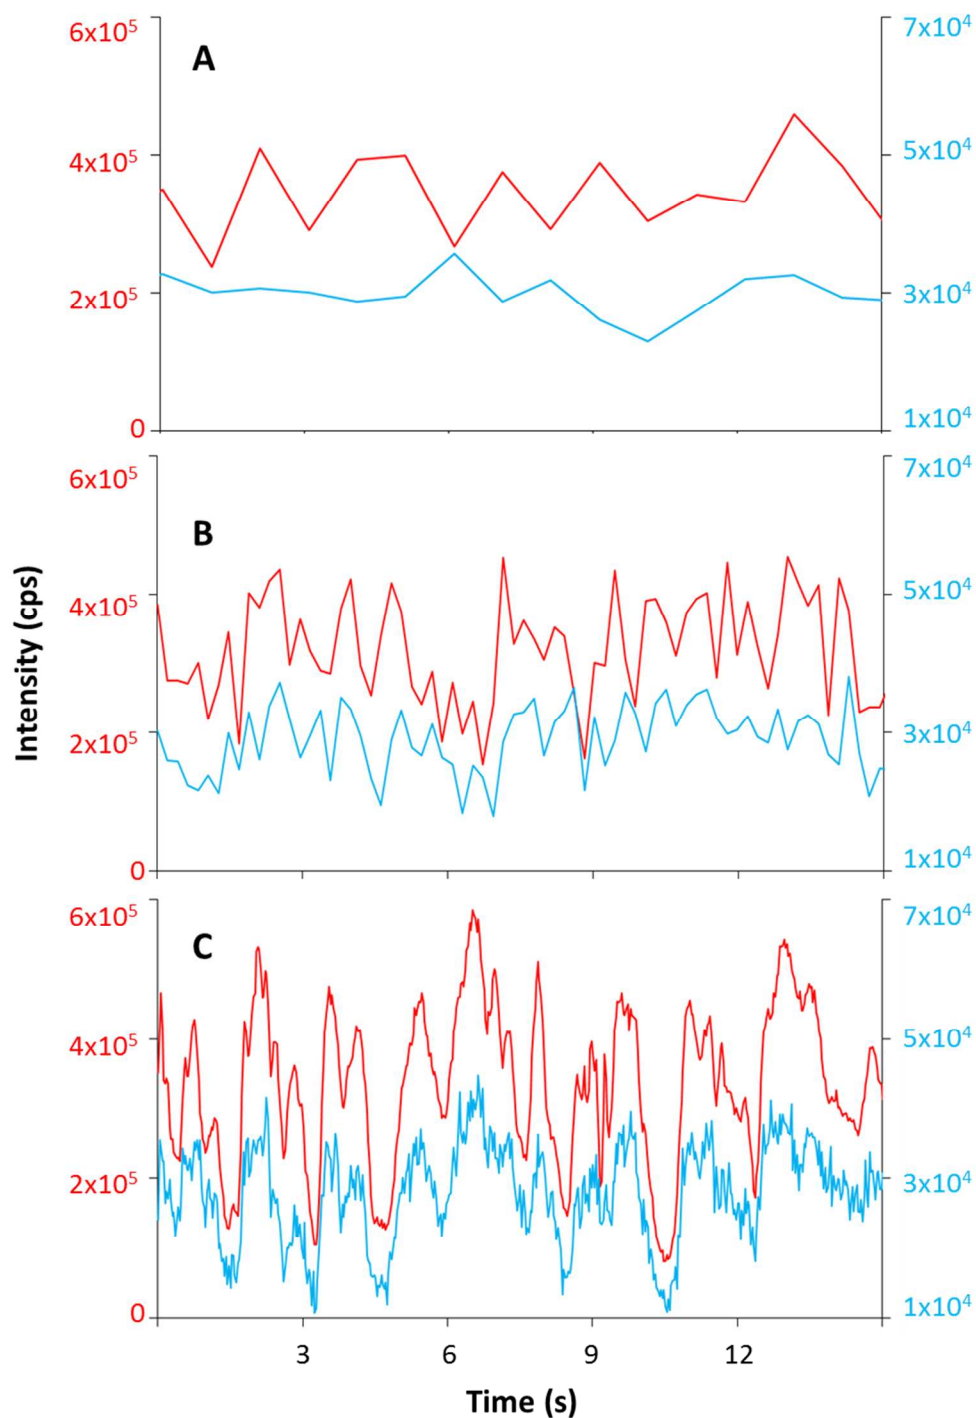

**Figure S4** is a plot of the nitrate ion at  $m/z$  62 with the y-axis on the right (lower intensity) and the nitrate-nitric acid adduct ion at  $m/z$  125 with the y-axis on the left (higher intensity). Figure S2 A is from selected ion monitoring (SIM) with a 500 ms dwell time, S2 B is from SIM with a 100 ms dwell time and S2 C is from SIM with a 10 ms dwell time. The figure demonstrates how the signal fluctuations between the 2 ions match with using short dwell times.
